# Supplementary material for: Precisely regulated galactosylation of nucleoside analogues in aqueous hydrophilic solvents catalyzed by solvent-stable β-galactosidase
Source: Royal Society of Chemistry journal article supplement (doi:10.1039/c6ra12167e), 2016-01-01
Supplement: c6ra12167e1.pdf [file c6ra12167e1.pdf]

1 **Precisely regulated galactosylation of nucleoside analogues in aqueous hydrophilic solvents**  
2 **catalyzed by solvent-stable  $\beta$ -galactosidase**

3 Youzhi Zhou <sup>a</sup>, Jianlin Chu <sup>a</sup>, Jinsong Zhang <sup>a</sup>, Ke Liu <sup>a</sup>, Bingfang He <sup>b,\*</sup>

4

5 **a** *College of Biotechnology and Pharmaceutical Engineering, Nanjing Tech University, China.*

6 **b** *School of Pharmaceutical Sciences, Nanjing Tech University, China.*

7 *Fax: + 86 25 5813 9935*

8 *Tel: + 86 25 5813 9902*

9 E-mail: bingfanghe@njtech.edu.cn

10

11

12

13

14

15

16

17

18

19

20

21

22

23

24

## 25 Cloning, heterologous expression and purification of BMG

26 The genomic DNA of *Bacillus megaterium* YZ08 was extracted using the Genomic DNA extraction  
27 kit (HAOJIA, Shanghai, China). The gene sequence of BMG was then obtained using primers of  
28 BMG-F (5'-GCGGGATCCGACGACGACGACAAGATGTTAAAAACCGGCAAGAAATT-3') and  
29 BMG-R (5'-GCGCTCGAGTTATAGAGGTTTTAGCGTAAACG-3'). The PCR product was ligated  
30 into pET28a (Novagen, Germany) vector using ClonExpress II One Step Cloning Kit (Vazyme,  
31 China). The verified recombinant plasmid was introduced into *E. coli* JM109 (DE3) for expression.  
32 Transformants were cultivated in LB medium containing kanamycin (50 µg/ml) at 37 °C, 180 rpm till  
33 OD<sub>600</sub> ~0.6-1.0, and then induced by the addition of 0.5 mM IPTG at 20 °C for 6 h. The cells were  
34 harvested by centrifugation and used for protein purification.

35 The recombinant BMG was purified as His-tagged protein in a Ni<sup>2+</sup>-affinity chromatography. All  
36 purification procedures were followed according to the manufacturer's instructions (GE Healthcare).  
37 The eluate containing recombinant BMG was incubated for 12 h at 4 °C in the presence of  
38 recombinant enterokinase (rEK, Duly, Nanjing), which effectively cleaved the BMG after Asp<sub>4</sub>-Lys.  
39 After the cleavage reaction, the reaction mixture was eluted with the binding buffer through a Ni<sup>2+</sup>-  
40 affinity column to remove the His-tagged rEK. The collected eluate without rEK was dialyzed in 20  
41 mM Tris-HCl buffer (pH 7.5).

42 The molecular mass of native BMG was analyzed by gel filtration chromatography on a Superdex  
43 200 pg gel filtration column (GE Healthcare). Purified BMG and protein standard (Gel Filtration  
44 Calibration Kits, GE Healthcare) were both eluted with 50 mM phosphate buffer (pH 7.2) containing  
45 150 mM NaCl at a rate of 1 mL/min. The molecular mass of BMG was determined from the standard  
46 curve based on elution volumes. Protein concentrations were determined according to Bradford  
47 method with bovine serum albumin as the standard.

## 48 HPLC analysis

49 The mixture of enzymatic galactosylation was analyzed by RP-HPLC on an Agilent TC-C18 column  
50 (4.6 mm × 250 mm, 5 μm) with a flow rate of 1 ml/min. An elution [water/methanol: 95/5 (v/v)] was  
51 used for the analysis of the mixture of enzymatic galactosylation of uridine, β-D-  
52 arabinofuranosyluracil, 2'-deoxyuridine, 5-methyl-2'-deoxyuridine, 5-fluoro-2'-deoxyuridine and  
53 inosine. The retention times of monogalactoside and substrate were 7.7 and 8.2 min (uridine, Fig S2);  
54 7.7 and 10.1 min (β-D-arabinofuranosyluracil, Fig S3). The retention times of digalactoside,  
55 monogalactoside and substrate were 5.9, 7.9 and 11.4 min (2'-deoxyuridine, Fig S4); 12.3, 16.7 and  
56 18.6 min (5-methyl-2'-deoxyuridine, Fig S5); 8.6, 11.2 and 16.7 min (5-fluoro-2'-deoxyuridine, Fig  
57 S6); 8.6, 12.3 and 16.7 min (inosine, Fig S7). An elution [water/methanol: 90/10 (v/v)] was used for the  
58 analysis of the mixture of enzymatic galactosylation of 2', 3'-dideoxythymidine. The retention times of  
59 digalactoside, monogalactoside and 2', 3'-dideoxythymidine were 10.4, 16.8 and 31.9 min (Fig S8).  
60 An elution [water/methanol: 80/20 (v/v)] was used for the analysis of the mixture of enzymatic  
61 galactosylation of AZT. The retention times of digalactoside, monogalactoside and AZT were 8.1,  
62 12.6 and 21.5 min (Fig S9).

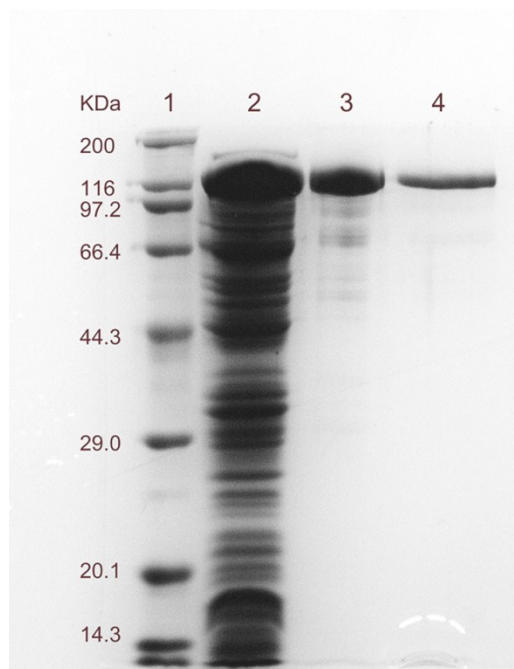

63  
64 **Fig S1** SDS-PAGE analysis of the recombinant BMG. Lane 1, marker; Lane 2, total cell protein after  
65 IPTG induction; Line 3, BMG purified by Ni<sup>2+</sup> column; Lane 4, purified BMG removed of His-tag.

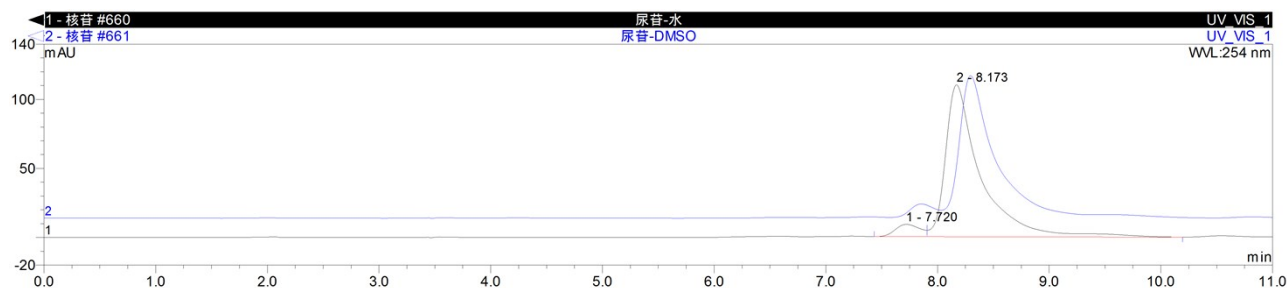

**Fig S2** HPLC analysis of the mixture of enzymatic galactosylation of uridine in buffer (black) and 10 % DMSO (blue).

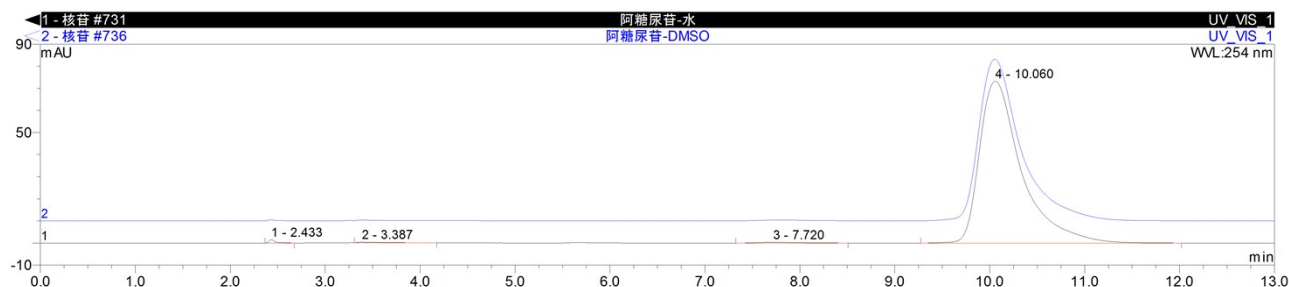

**Fig S3** HPLC analysis of the mixture of enzymatic galactosylation of  $\beta$ -D-arabinofuranosyluracil in buffer (black) and 10 % DMSO (blue).

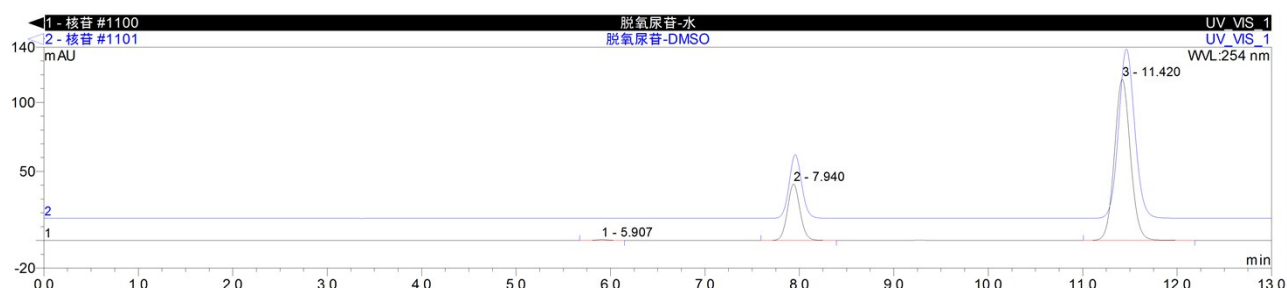

**Fig S4** HPLC analysis of the mixture of enzymatic galactosylation of 2'-deoxyuridine in buffer (black) and 10 % DMSO (blue).

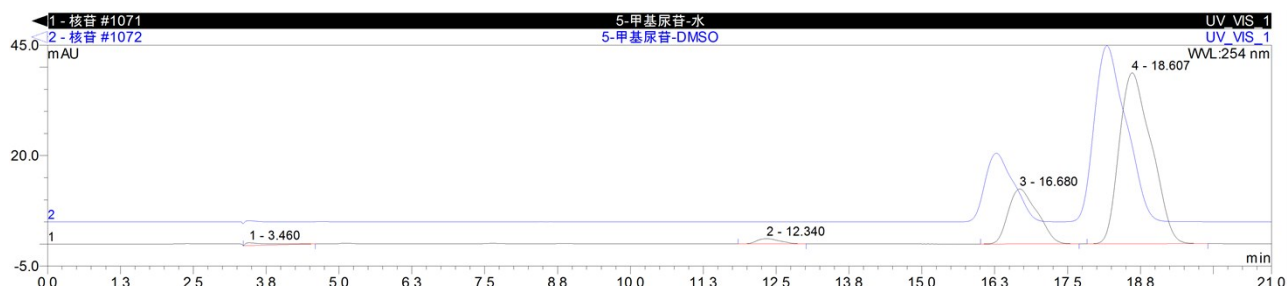

**Fig S5** HPLC analysis of the mixture of enzymatic galactosylation of 5-methyl-2'-deoxyuridine in buffer (black) and 10 % DMSO (blue).

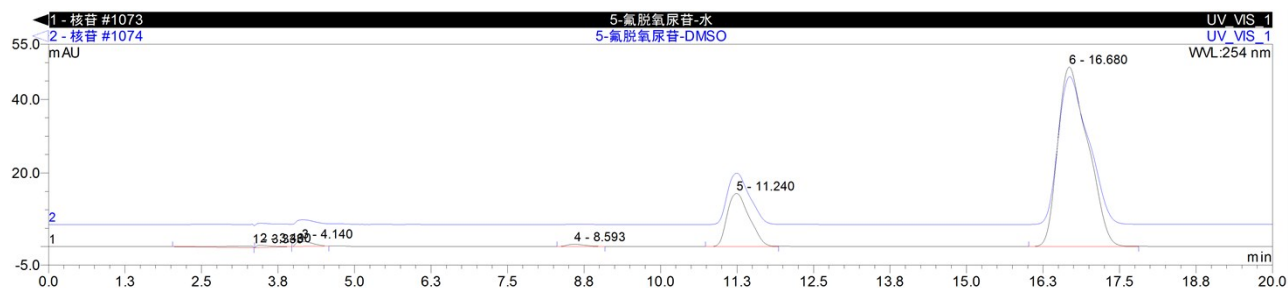

**Fig S6** HPLC analysis of the mixture of enzymatic galactosylation of 5-fluoro-2'-deoxyuridine in buffer (black) and 10 % DMSO (blue).

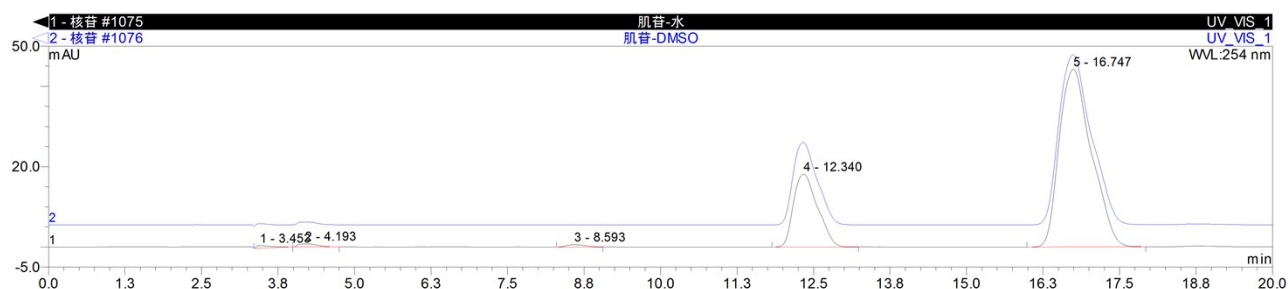

**Fig S7** HPLC analysis of the mixture of enzymatic galactosylation of inosine in buffer (black) and 10 % DMSO (blue).

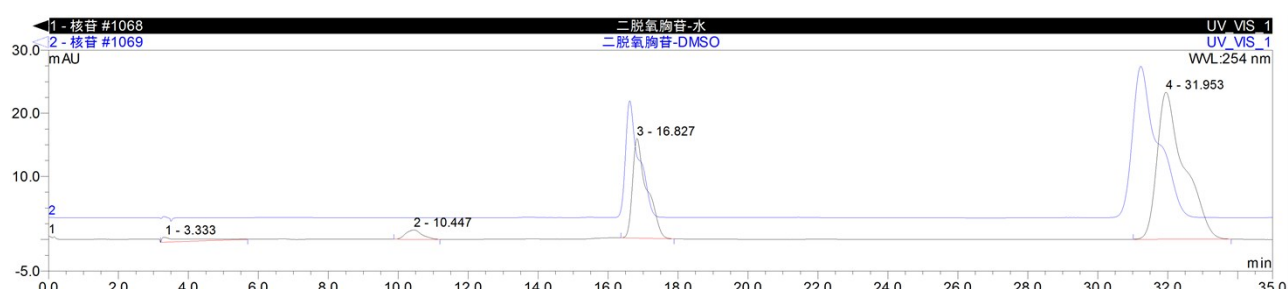

**Fig S8** HPLC analysis of the mixture of enzymatic galactosylation of 2',3'-dideoxythymidine in buffer (black) and 10 % DMSO (blue).

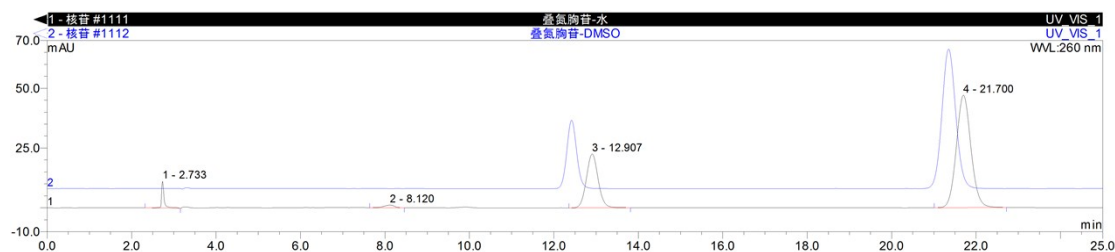

**Fig S9** HPLC analysis of the mixture of enzymatic galactosylation of AZT in buffer (black) and 10 % DMSO (blue).

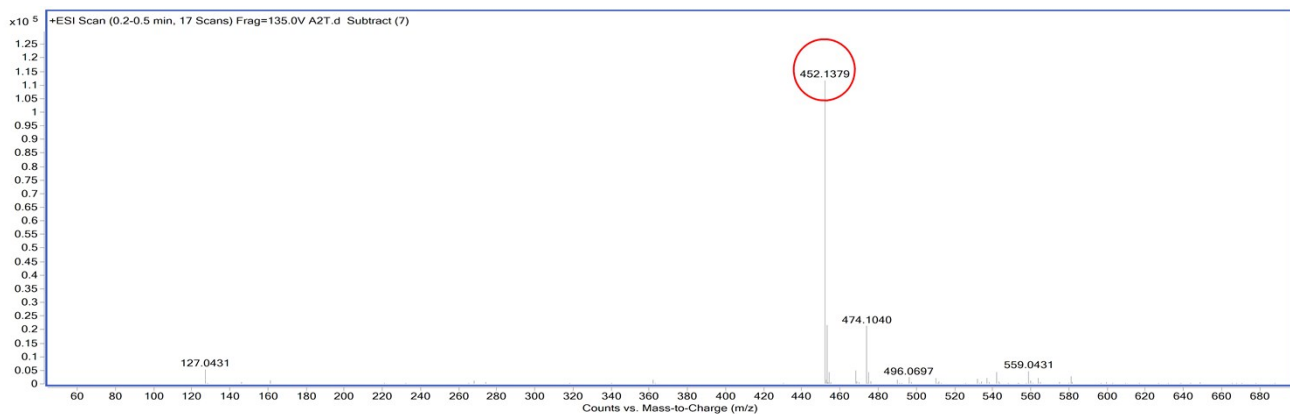

90

91 **Fig S10** Mass spectrometry for AZT monogalactoside.

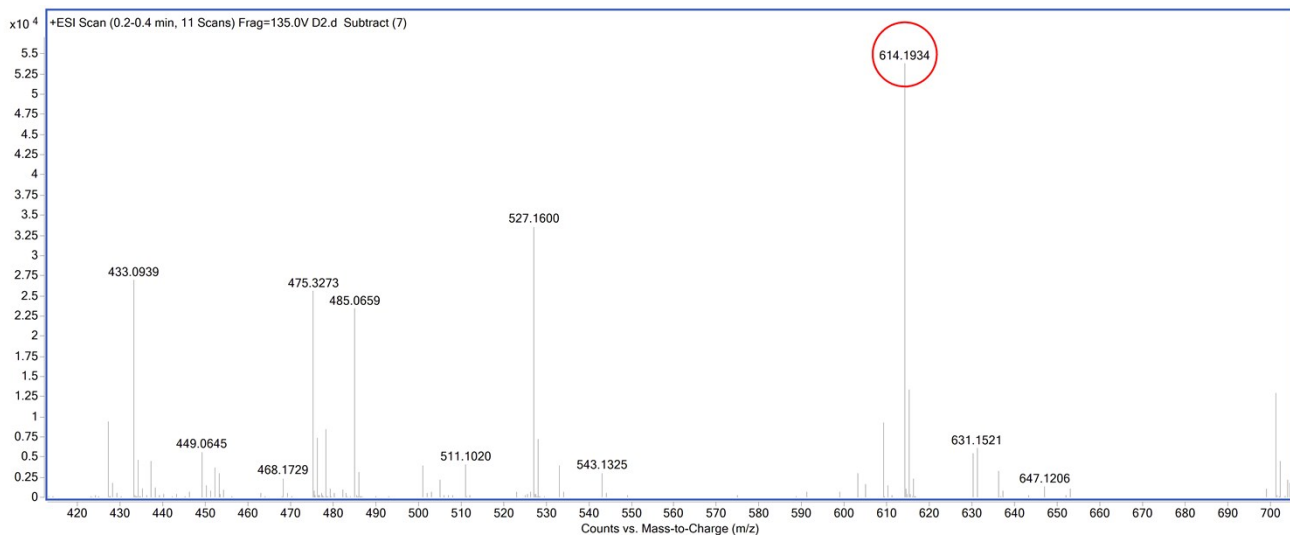

92

93 **Fig S11** Mass spectrometry for AZT digalactoside.

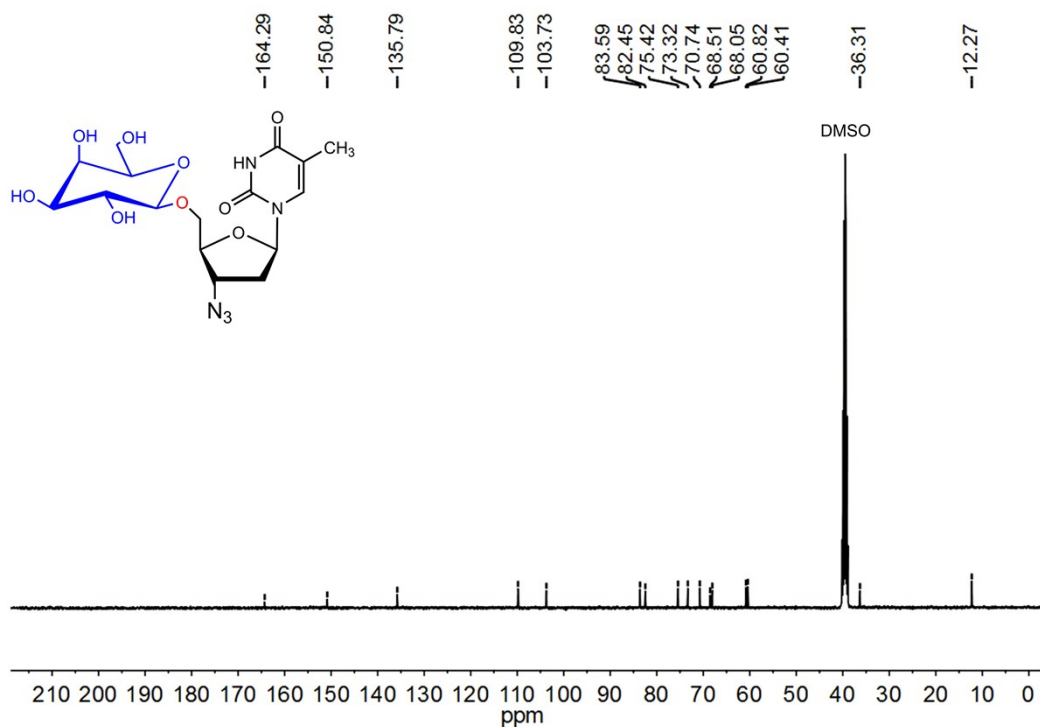

94

95 **Fig S12** <sup>13</sup>C for the 5'-O-β-galactosyl-3'-azido-3'-deoxythymidine.

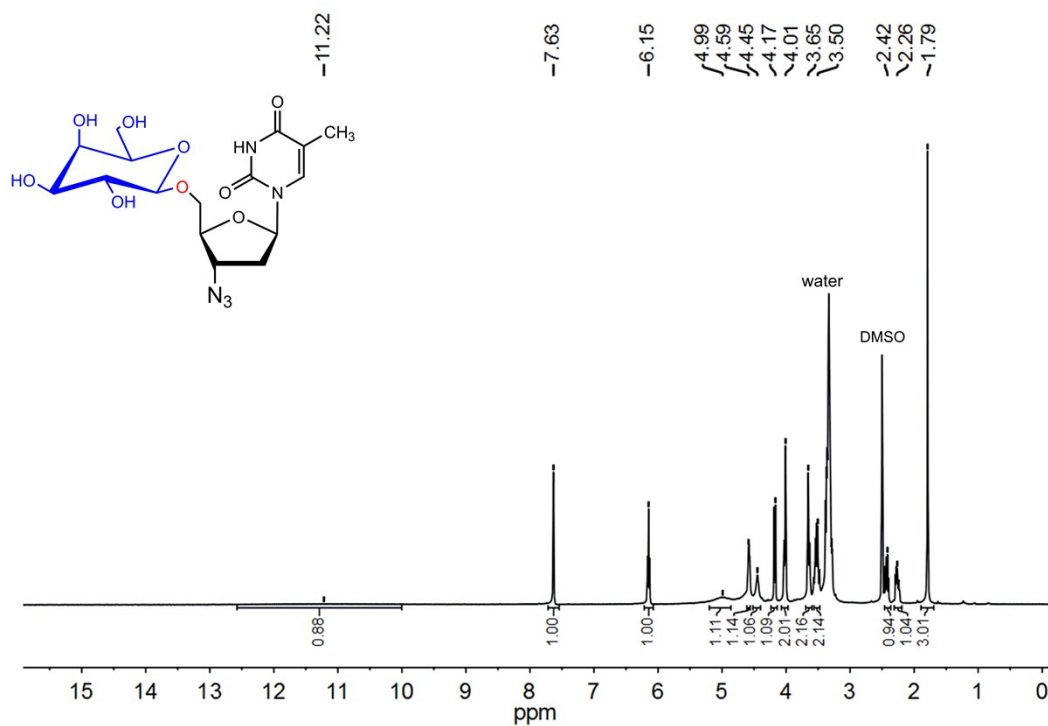

96

97 **Fig S13**  $^1\text{H}$  for the 5'-O- $\beta$ -galactosyl-3'-azido-3'-deoxythymidin.

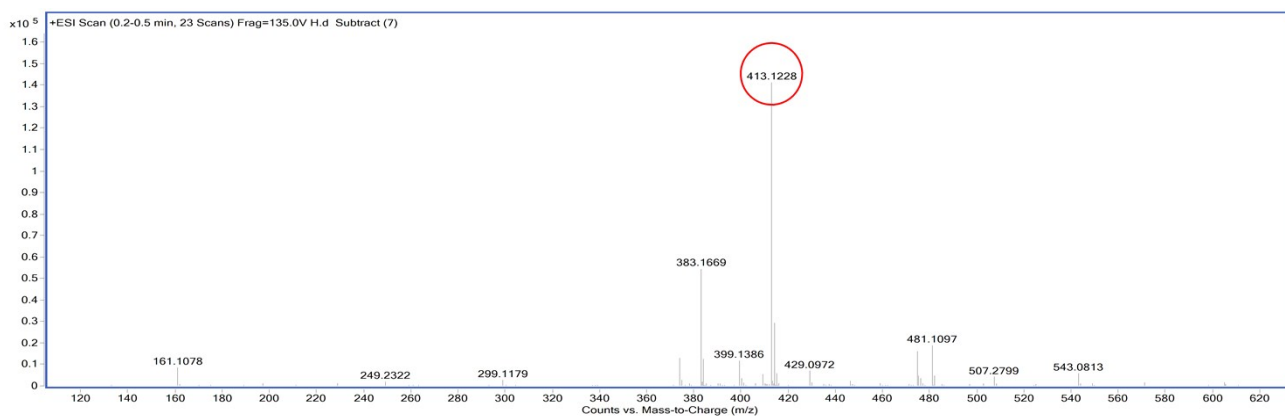

98

99 **Fig S14** Mass spectrometry for 2'-deoxyuridine monogalactoside.

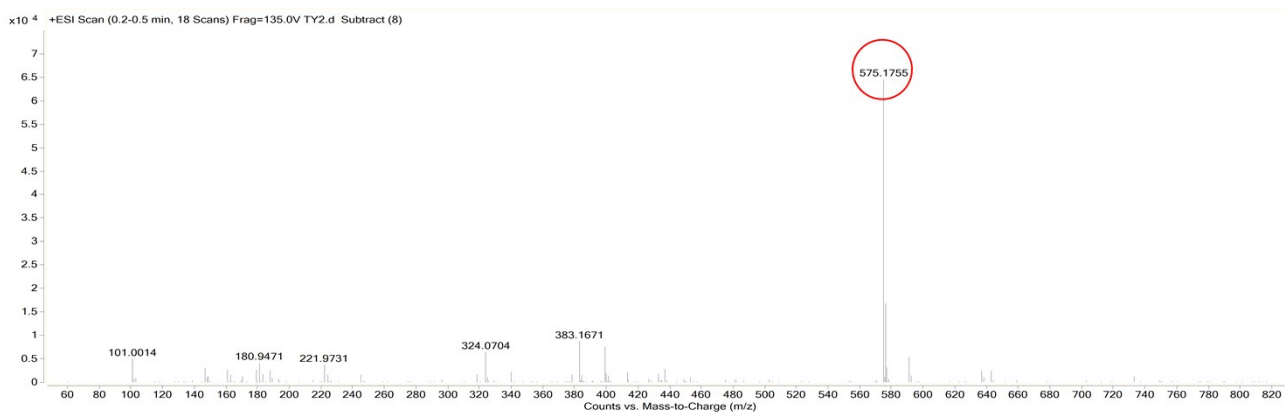

100

101 **Fig S15** Mass spectrometry for 2'-deoxyuridine digalactoside.

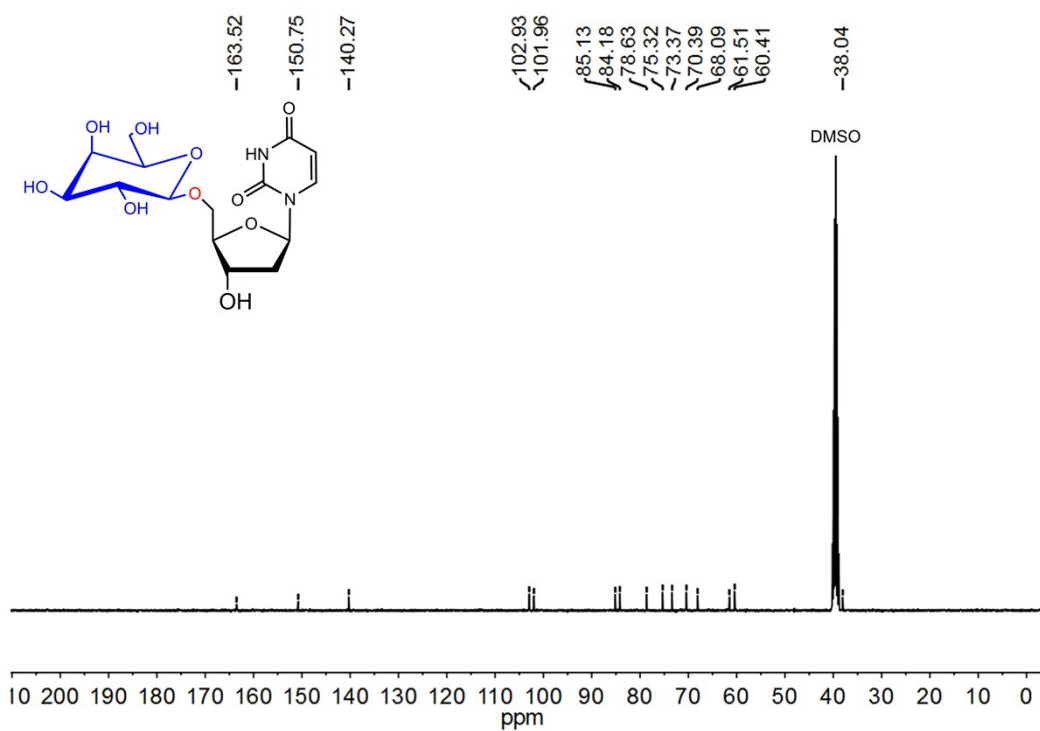

102

103 **Fig S16**  $^{13}\text{C}$  for the 5'-O-β-galactosyl-3'-azido-2'-deoxyuridine

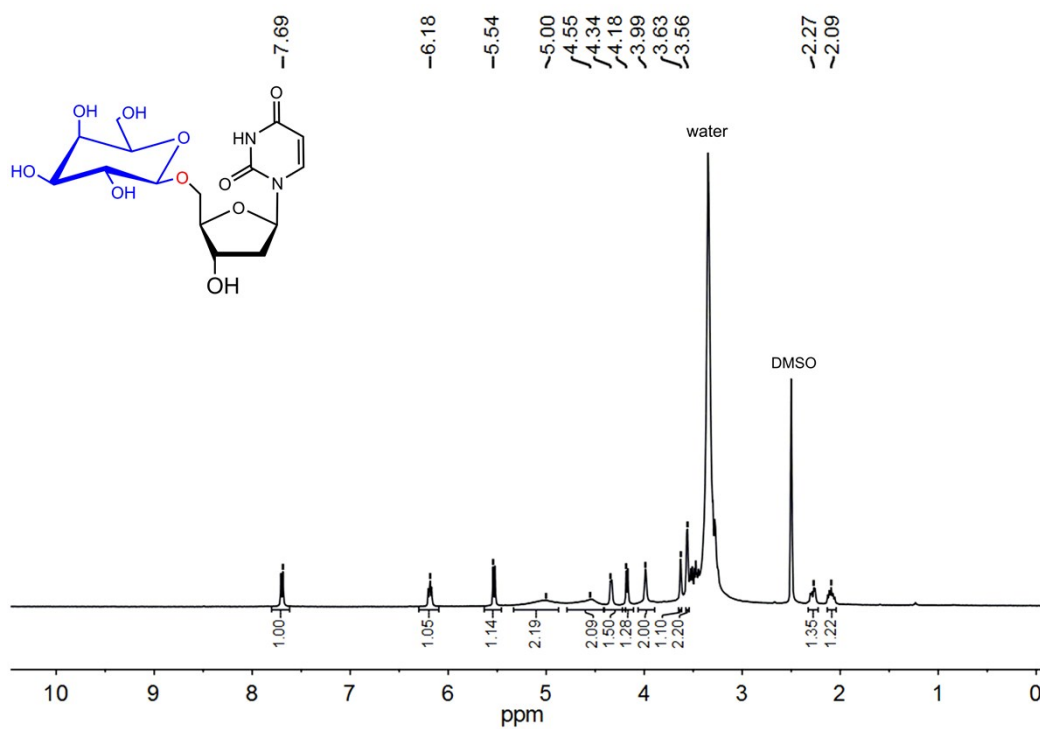

104

105 **Fig S17**  $^1\text{H}$  for the 5'-O-β-galactosyl-3'-azido-2'-deoxyuridine
